# Supplementary material for: Convection-Enhanced Delivery of a Virus-Like Nanotherapeutic Agent with Dual-Modal Imaging for Besiegement and Eradication of Brain Tumors
Source: PubMed Central journal article supplement — Theranostics. 2019 Feb 28;9(6):1752–63. doi: 10.7150/thno.30977 (PMC6485197; doi:10.7150/thno.30977), 2019-02-28
Supplement: thnov09p1752s1.pdf [file thnov09p1752s1.pdf]

## Supplementary Information

### **Convection-enhanced delivery of a virus-like nanotherapeutic agent with dual-modal imaging for besiegement and eradication of brain tumors**

Hao-Han Pang, Pin-Yuan Chen, Kuo-Chen Wei, Chiun-Wei Huang, Yow-Ling Shiue, Chiung-Yin Huang\*, Hung-Wei Yang\*

Email: [chyinhuang@gmail.com](mailto:chyinhuang@gmail.com) (Chiung-Yin Huang); [howardyang@mail.nsysu.edu.tw](mailto:howardyang@mail.nsysu.edu.tw) (Hung-Wei Yang)

#### **This PDF file includes:**

Tables. S1 and S2

Figures. S1 to S9

**Table S1.** Primers used for pCDFDuet-1-Q $\beta$ CP- GFP construction

| Primer name      | Primer sequence                           |
|------------------|-------------------------------------------|
| Q $\beta$ CP-Fwd | 5'-GTGGCCATGGATGGCAAAATTAGAGACTGTTA-3'    |
| Q $\beta$ CP-Rev | 5'-CACCAAGCTTTCAATACGCTGGG-3'             |
| GFP-Fwd          | 5'-GTGGAGATCTCATGGCTAGCAAAGGAGAAGAACTC-3' |
| GFP-Rev          | 5'-CACCCCTAGGTCAGTTGTACAGTTCATCCATGCC-3'  |

Restriction sites: Q $\beta$ CP-Fwd (NcoI), Q $\beta$ CP-Rev (HindIII), GFP-Fwd (BglII), GFP-Rev (AvrII)

**Table S2.** Characterization of gVLPs, EPI@gVLPs, and EPI@CPP-gVLPs by dynamic light scattering (n = 3)

|               | Size average (nm) | PDI             | Zeta potential (mV) |
|---------------|-------------------|-----------------|---------------------|
| gVLPs         | 32.1 $\pm$ 0.6    | 0.11 $\pm$ 0.05 | -0.71 $\pm$ 0.36    |
| EPI@gVLPs     | 33.2 $\pm$ 0.2    | 0.18 $\pm$ 0.02 | -0.87 $\pm$ 0.41    |
| EPI@CPP-gVLPs | 40.3 $\pm$ 0.5    | 0.27 $\pm$ 0.04 | 0.03 $\pm$ 0.05     |

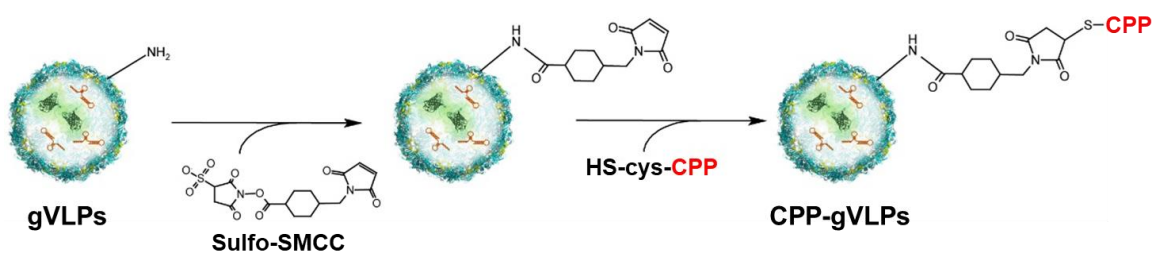

**Figure S1.** Chemical structural formula of each component and preparation of the CPP-modified gVLPs (CPP-gVLPs) using sulfo-SMCC as a linker

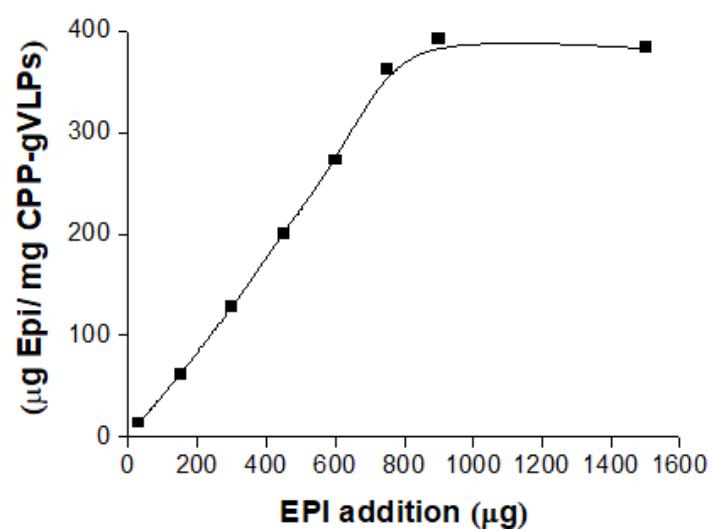

**Figure S2.** Quantitation of loaded EPI in 1 mg of CPP-gVLPs versus added EPI

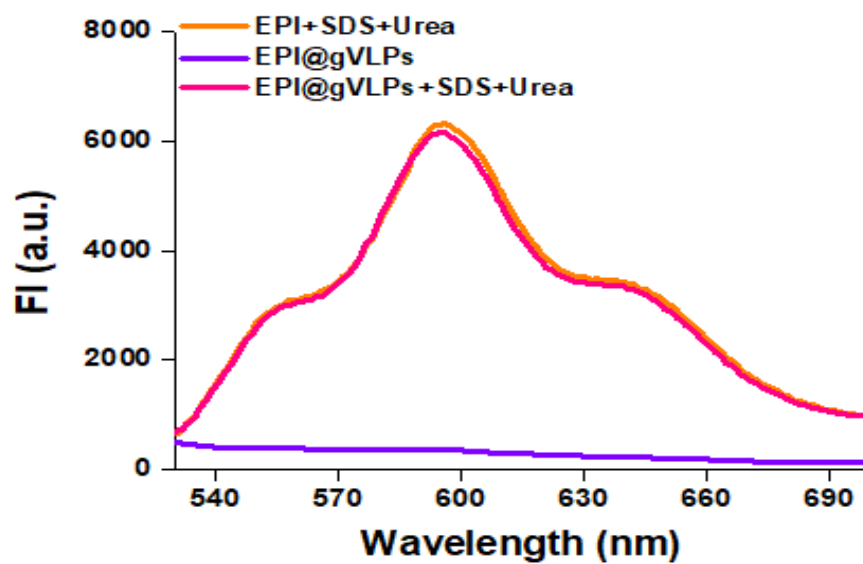

**Figure S3.** The fluorescence spectra of EPI+SDS+Urea, EPI@gVLPs, and EPI@gVLPs+SDS+Urea under excitation at 480 nm. SDS (10%, 10  $\mu$ L) and Urea (8 M, 10  $\mu$ L) were added both for protein and RNA denaturing to simulate the situation that VLPs after being up-taken by cells and destroyed followed by EPI release

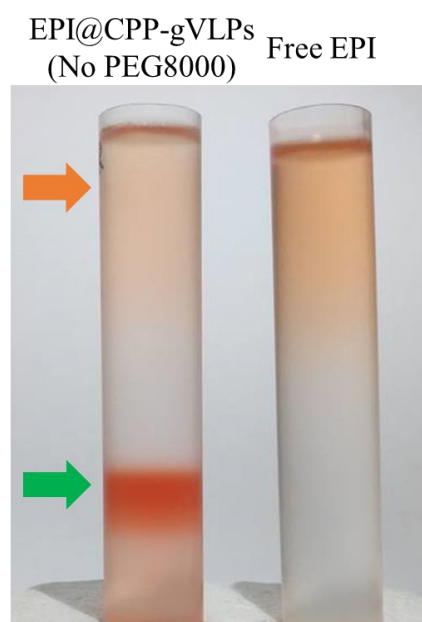

**Figure S4.** Ultracentrifugation of EPI@CPP-gVLPs without PEG8000/NaCl purification process; the orange arrow indicates free EPI and the green arrow indicates EPI@CPP-gVLPs

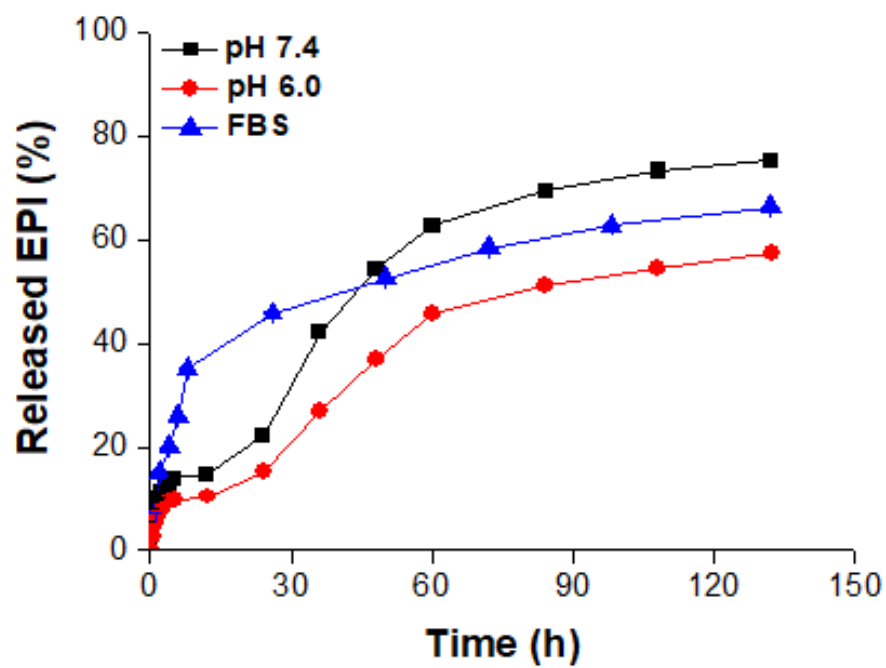

**Figure S5.** EPI release from EPI@CPP-gVLPs (EPI concentration, 0.23 mg/mL) in 10.4 mL of PBS (pH 6.0 or 7.4) and FBS for a period of incubation at 37°C

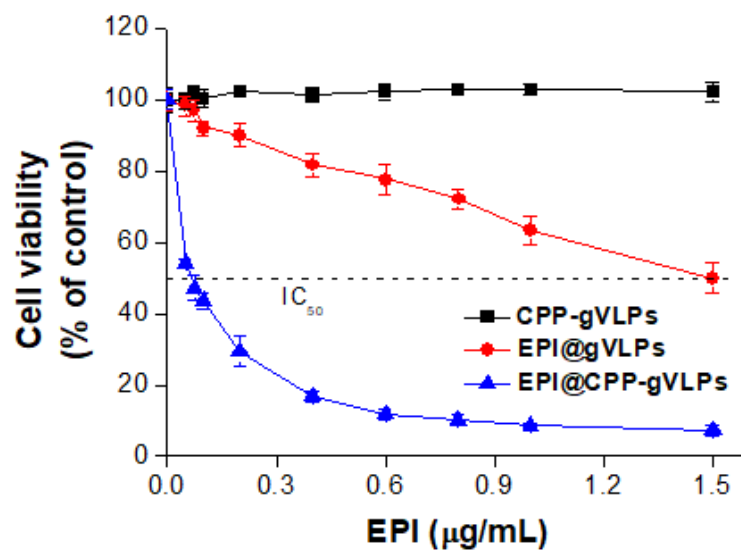

**Figure S6.** Cell viability of U87-MG cells treated with CPP-gVLPs, EPI@gVLPs, and EPI@CPP-gVLPs for 24 h by XTT assay

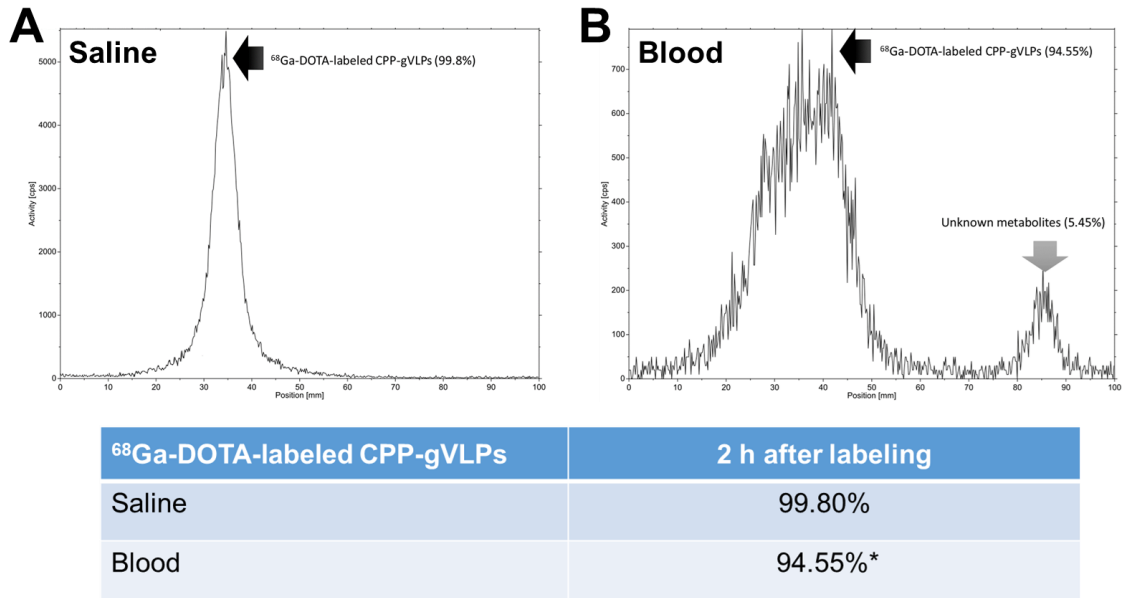

\* The 5.45% of unknown metabolites was identified in the late phase radio-TLC profile.

**Figure S7.** Stabilities of <sup>68</sup>Ga-DOTA-labeled CPP-gVLPs suspended in (A) saline and (B) blood for 2 h after <sup>68</sup>Ga-DOTA labeling

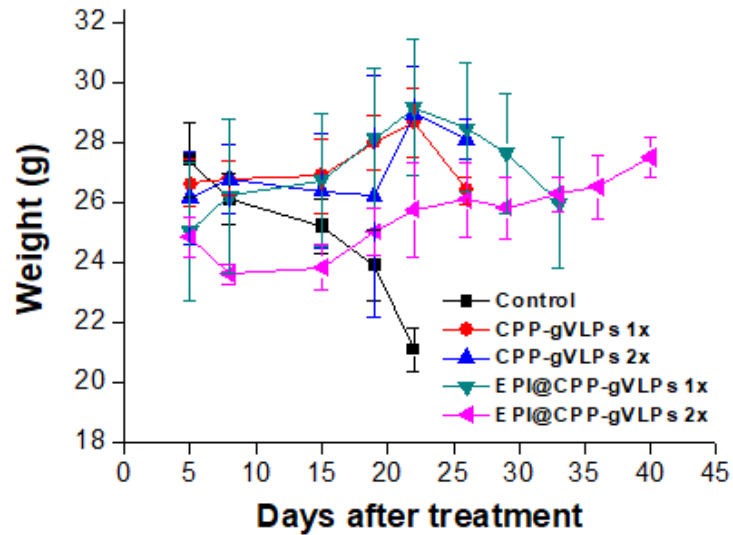

**Figure S8.** Body weights of mice that received CED infusions of PBS (control), 3.6 mg/kg of CPP-gVLPs, 3.6 mg/kg of CPP-gVLPs (twice; once a week), 5.0 mg/kg of EPI@CPP-gVLPs (containing 1.4 mg of EPI/kg), and 5.0 mg/kg of EPI@CPP-gVLPs (containing 1.4 mg of EPI/kg; twice; once a week)

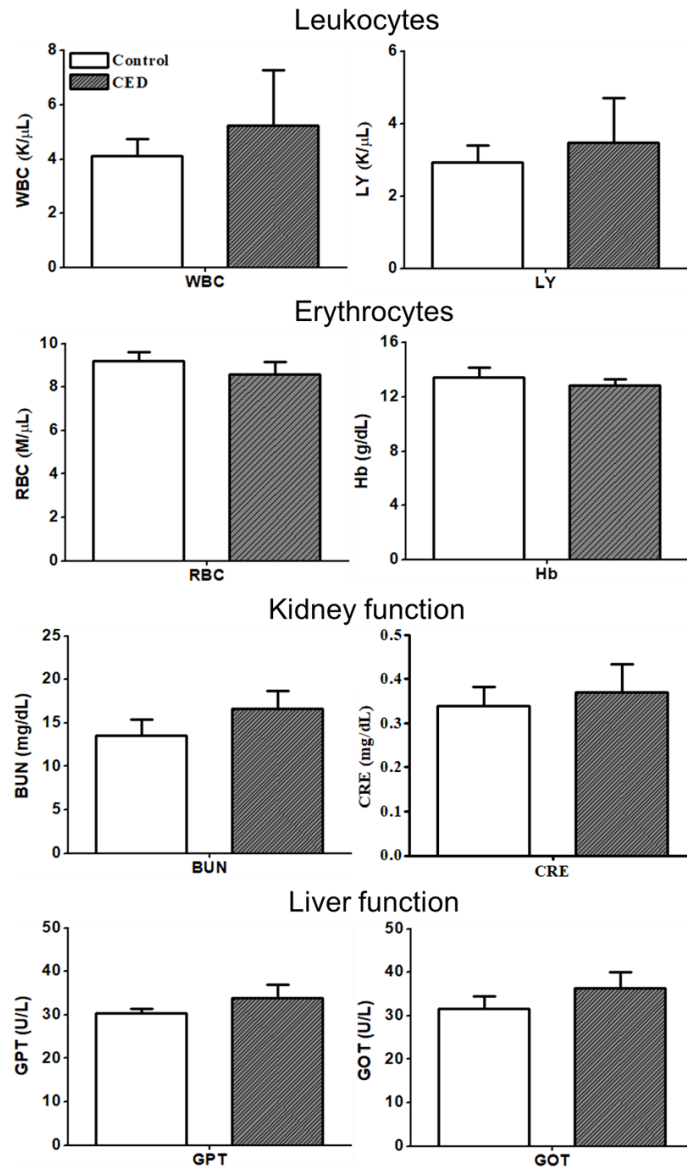

**Figure S9.** Blood-biochemistry analysis of the animals after 7 days of CPP-gVLPs administration through the tail vein or CED compared with the control group. Values are expressed as means  $\pm$  SD ( $n = 3$ ). WBC: white blood cells (normal: approximately 1.8–10.7 K/ $\mu$ L); LY: lymphocytes (normal: approximately 0.9–9.3 K/ $\mu$ L); RBC: red blood cells (normal: approximately 6.4–9.4 M/ $\mu$ L); Hb: hemoglobin (normal: approximately 11.0–15.1 g/dL); BUN: blood urea nitrogen (normal: approximately 6.0–21.0 mg/dL);

CRE: creatinine (normal: approximately 0.3–1.5 mg/dL); GPT: glutamic-pyruvic transaminase (normal: approximately 0–44.0 U/L); GOT: glutamic-oaa transaminase (normal: approximately 0–38.0 U/dL).
